# Supplementary material for: Boron-doped NiCoP nanoarrays with wrinkles grown on carbon cloth for hybrid supercapacitor applications
Source: Royal Society of Chemistry journal article supplement (doi:10.1039/d4nj01632g), 2024-01-01
Supplement: d4nj01632g1.pdf [file d4nj01632g1.pdf]

## **Boron-doped NiCoP Nanoarrays with Wrinkle Grown on Carbon Cloth for Hybrid Supercapacitor Application**

Zhe Zhang<sup>a</sup>, Xuetao Zhang<sup>b</sup>, Chunqing Tai<sup>a</sup>, Mingzhi Wei<sup>\* a, c</sup>, Qifang Lu<sup>a</sup>, Enyan Guo<sup>a</sup>, Conghui Si<sup>a</sup>, Shunwei Chen<sup>a</sup>, Xiujun Han<sup>a</sup>

<sup>a</sup>Shandong Provincial Key Laboratory of Processing and Testing Technology of Glass & Functional Ceramics, School of Material Science and Engineering, Qilu University of Technology (Shandong Academy of Sciences), Jinan 250353, China

<sup>b</sup>Beijing Key Laboratory of Microstructure and Properties of Solids, Faculty of Materials and Manufacturing, Beijing University of Technology, Beijing 100124, China

<sup>c</sup>Dezhou Institute of Qilu University of Technology (Shandong Academy of Sciences), Dezhou, China

\*Corresponding authors.

E-mail: [weimz2018@163.com](mailto:weimz2018@163.com)

## Chemicals

Sinopharm Chemical Reagent Co. Ltd. was the supplier of chemicals, which were used as purchased. The syntheses of the NiCoP and B-NiCoP samples were prepared by carbon cloth, Nitric acid (GR), acetone (AR),  $(\text{Ni}(\text{NO}_3)_2 \cdot 6\text{H}_2\text{O}, 99.9\%)$ ,  $(\text{Co}(\text{NO}_3)_2 \cdot 6\text{H}_2\text{O}, 99.9\%)$ , urea (99%),  $\text{NaH}_2\text{PO}_2 \cdot \text{H}_2\text{O}$  (95%),  $\text{NaBH}_4$ , KOH, deionized water (DI) and ethanol. The activated carbon used was purchased from Fuzhou, China, model: YEC-8.

## Materials characterization

The crystalline structure was pointed out by a powder X-ray diffraction (XRD, Bruker, AXS D8) with  $\text{Cu K}\alpha$  ( $\lambda = 0.15406 \text{ nm}$ ). The morphologies were demonstrated by scanning electron microscopy (SEM, JEOL JSM-6700F) and transmission electron microscope (TEM, JEOL JEM-2010). Surface element composition and chemical state analysis of the sample were characterized by XPS (ESCALABXi+).

## Electrochemical test of supercapacitor

To further evaluate the electrochemical performance of NCP, B-NCP-16, B-NCP-18, and B-NCP-20, the cyclic voltammetry (CV), galvanostatic charge-discharge test (GCD), and electrochemical impedance spectroscopy (EIS) were performed using a CHI760E electrochemical workstation. The platinum sheet and Hg/HgO electrode were used as counter electrodes and reference electrodes, respectively, and 3 M KOH aqueous solution was used as electrolyte.

The specific capacity of NCP, B-NCP-16, B-NCP-18, and B-NCP-20 was calculated using the following equation:

$$C = (I \times \Delta t) / m \quad (1)$$

while the specific capacitance of AC was calculated using the following equation:

$$C = (I \times \Delta t) / (m \times \Delta V) \quad (2)$$

where  $I$  (A) is the discharge current,  $\Delta V$  (V) is the width of the potential window,  $\Delta t$  (s) is the time of discharge, and  $m$  (g) is the loading mass of active material.

For the two-electrode system, B-NCP-18 was used as the positive electrode, activated carbon as the negative electrode and 3 M KOH as the electrolyte to assemble

B-NCP-18||AC hybrid supercapacitors. The area of the active material was  $1 \times 2 \text{ cm}^2$ .

The mass loadings of AC were controlled based on the balanced charge principle.

$$C_+ \times m_+ \times (\Delta V)_+ = C_- \times m_- \times (\Delta V)_- \quad (3)$$

where  $m_+/m_-$  is the mass of anode/cathode material. The mass loadings of AC were 9.64 mg.

The energy density ( $E$ , Wh  $\text{kg}^{-1}$ ), and power densities ( $P$ , W  $\text{kg}^{-1}$ ) of HSCs were calculated according to the following equations:

$$C = (I \times \Delta t)/m \quad (4)$$

$$E = (\int IU(t)dt)/3.6m \quad (5)$$

$$P = (3600 \times E)/\Delta t \quad (6)$$

where  $C$  ( $\text{C g}^{-1}$ ) refers to the specific capacity,  $I$  (A) is the discharge current,  $\Delta t$  (s) is the time of discharge,  $m$  (g) is the loading mass of active material, and  $U$  (V) is the width of the potential window.

## Computational details

All calculations were based on DFT, executed by Vienna Ab-initio Simulation Package (VASP). The whole three-dimensional (3D) periodic models were constructed by Materials Studio (MS). The Perdew-Burke-Ernzerhof (PBE) of generalized gradient approximation (GGA) was used to describe the exchange-correlation effect. The core interactions were treated using the pseudo-potential of projector-augmented-wave (PAW) method. In this study, the NiCoP model was obtained by subjecting the NiCoP protocells to a  $2 \times 2$  supercell. The energy cutoff of 520 eV and  $3 \times 3 \times 10$  k-points for entire geometry calculation. The Hubbard-U correction was adopted for better description of the localized d-electrons of Ni and Co in their hydroxides. We chose an effective  $U-J$  value of 6.4 eV and 3.3 eV for Ni and Co atoms, respectively. All the geometry structures and atomic positions were fully relaxed by a conjugate gradient (CG) method with convergence criteria of 0.02 eV  $\text{\AA}^{-1}$  and  $10^{-5}$  eV  $\text{atom}^{-1}$  for force and energy, respectively.

The following formula has been used to calculate the  $E_{\text{ads}}$ :

$$E_{\text{ads}} = E_{\text{slab+adsorbent}} - E_{\text{slab}} - E_{\text{adsorbent}}$$

where  $E_{\text{slab}}$ ,  $E_{\text{adsorbent}}$ , and  $E_{\text{slab+adsorbent}}$  are the total energies of the optimized slab of structures, adsorbents, and slab+adsorbent systems, respectively.

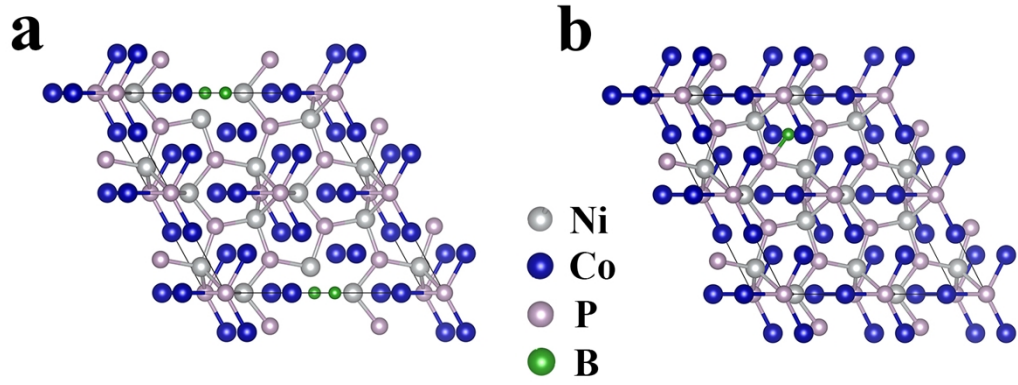

**Fig. S1** The optimization model for substitutional doping and interstitial doping of B doped NiCoP

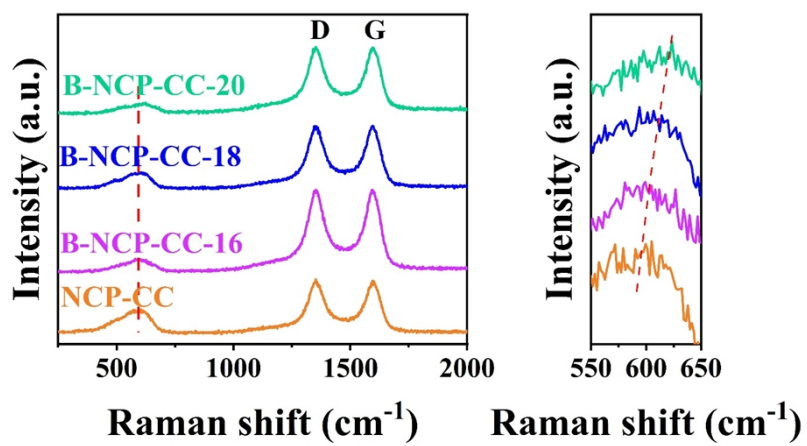

**Fig. S2** Raman spectra of NCP-CC, B-NCP-CC-16, B-NCP-CC-18, and B-NCP-CC-20

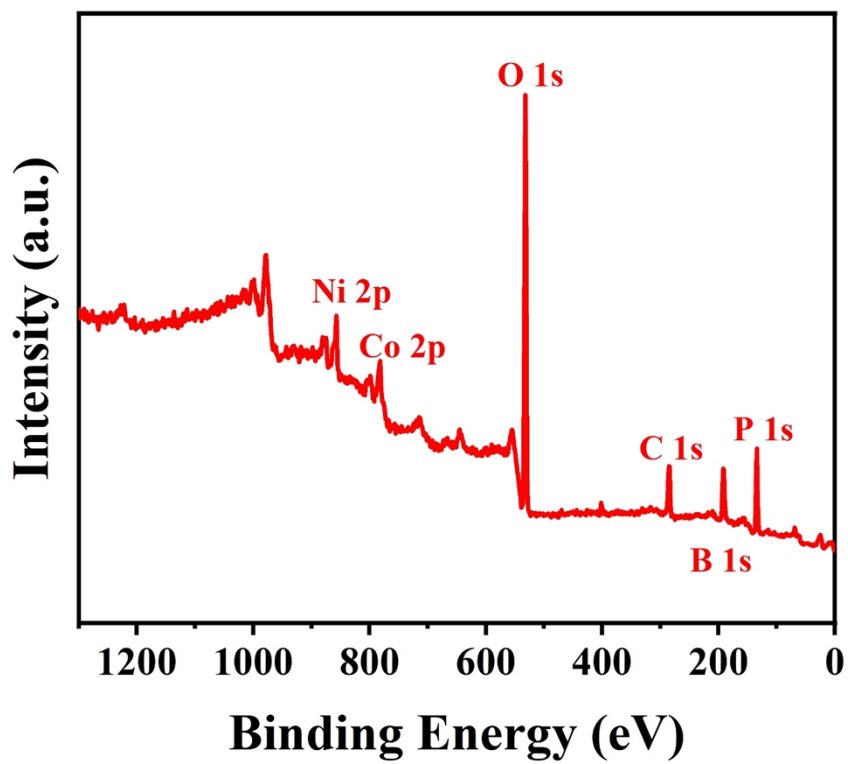

Fig. S3 XPS survey spectrum of B-NCP-CC-18

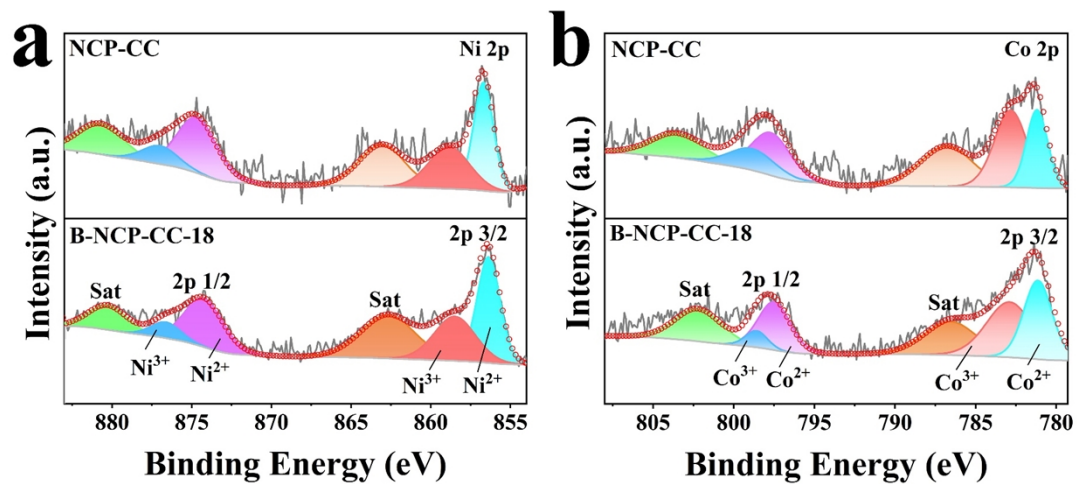

**Fig. S4** Comparison of high-resolution XPS spectra of NCP-CC and B-NCP-CC-18 (a) Ni 2p, (b) Co 2p



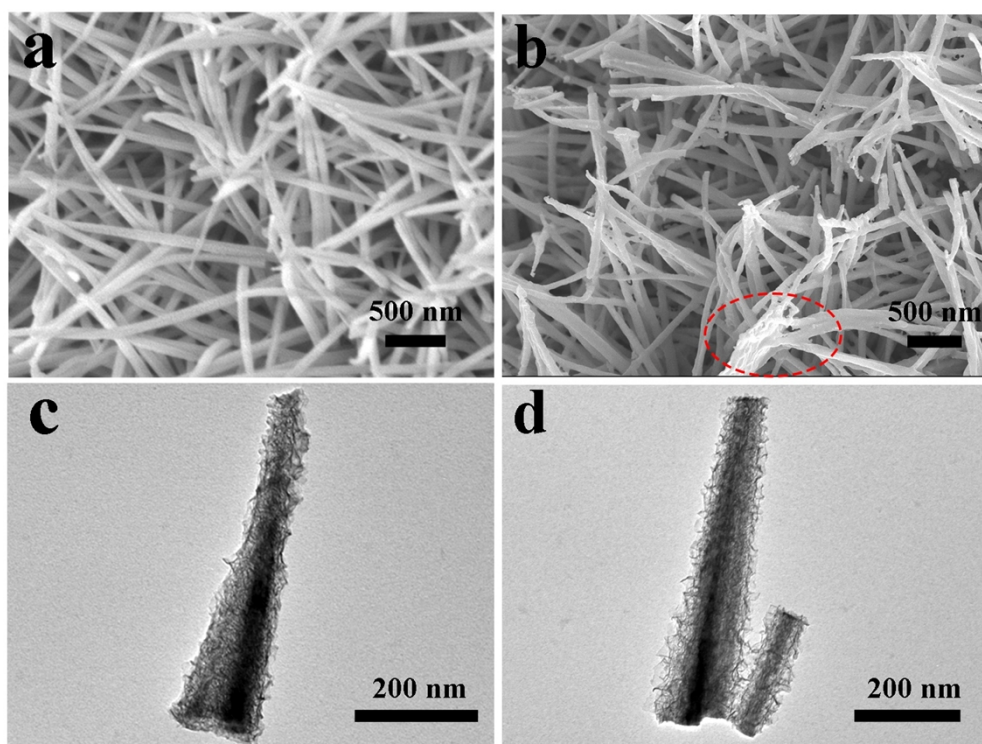

**Fig. S5** SEM images of (a)B-NCP-CC-16 and (b)B-NCP-CC-20; and TEM images of (c)B-NCP-CC-16 and (d)B-NCP-CC-20.

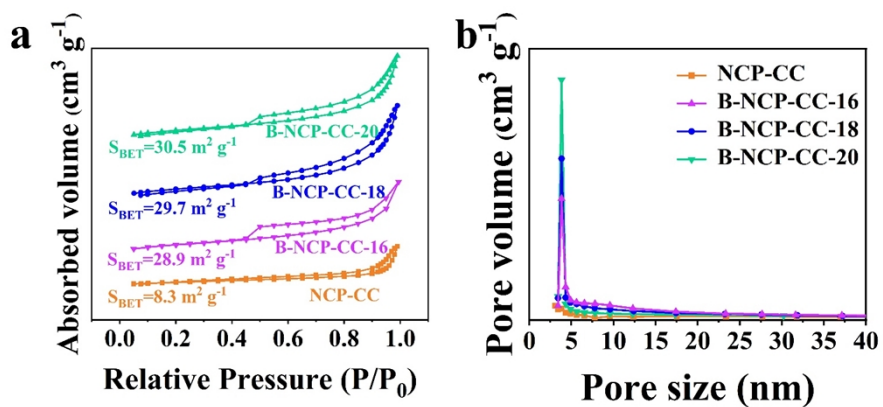

**Fig. S6** (a)  $N_2$  adsorption/desorption isotherms and (b) pore size distributions of NCP-CC, B-NCP-CC-16, B-NCP-CC-18, and B-NCP-CC-20.

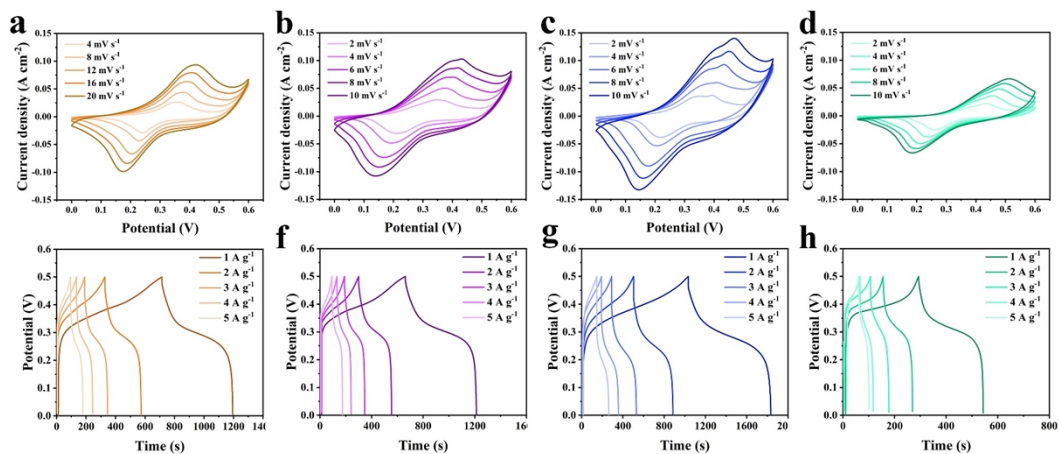

**Fig. S7** (a-d) CV curves and (e-h) GCD curves of NCP-CC, B-NCP-CC-16, B-NCP-CC-18, and B-NCP-CC-20

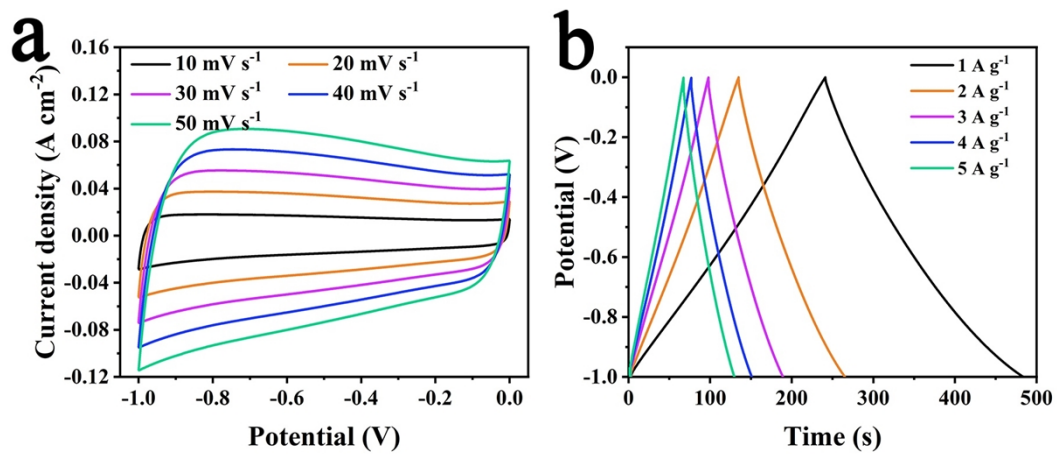

Fig. S8 (a) CV curves and (b) GCD curves of AC

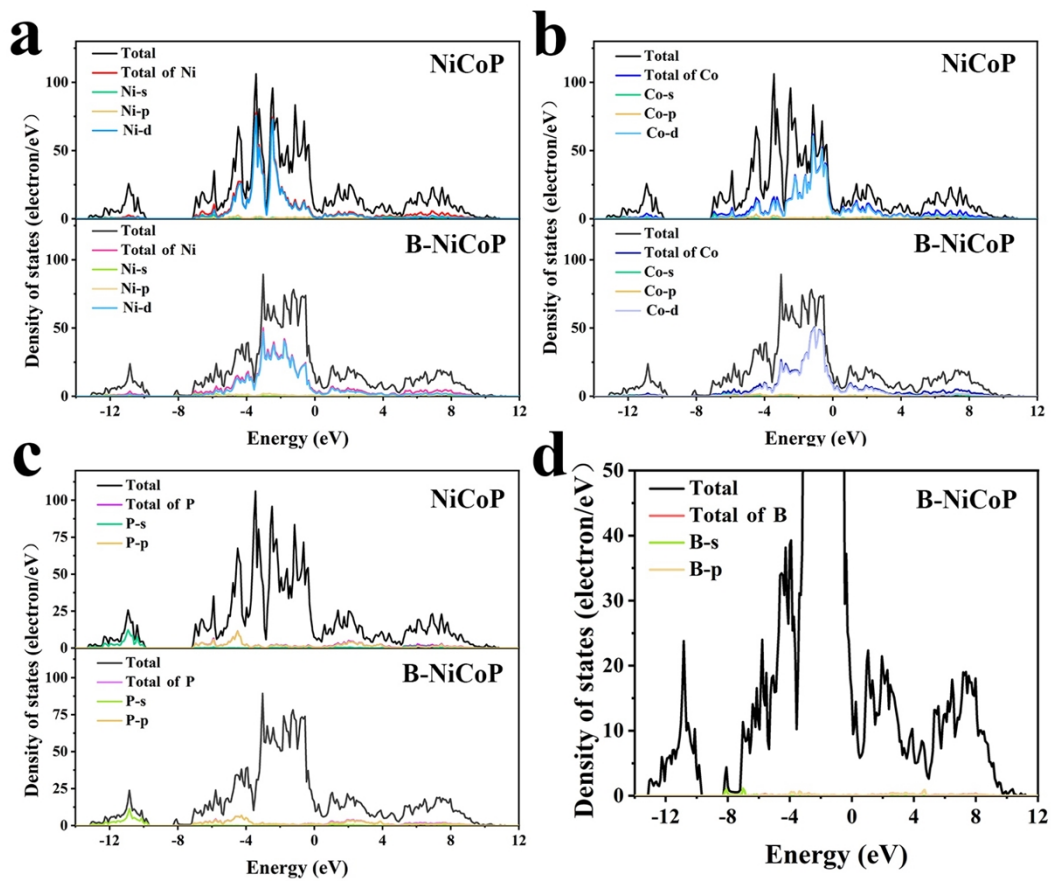

Fig. S9 TDOS and PDOS of (a) Ni, (b) Co, (c) P, and (d) B

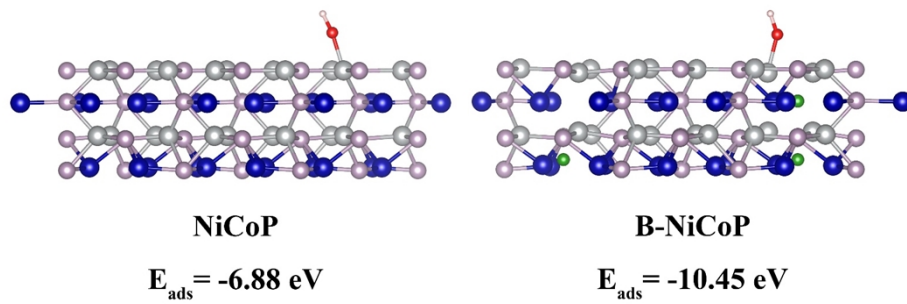

**Fig. S10** Optimized adsorption models and adsorption energy of OH<sup>-</sup> for NiCoP and B-NiCoP

**Table S1** Comparison of three electrode properties of B-NCP-CC-18 electrode material with reported positive electrode material

| <b>Electrode material</b>            | <b>Morphology</b>                            | <b>Electrolyte</b> | <b>Specific capacity /C g<sup>-1</sup></b> | <b>Specific capacity /F g<sup>-1</sup></b> | <b>Ref</b> |
|--------------------------------------|----------------------------------------------|--------------------|--------------------------------------------|--------------------------------------------|------------|
| B-NCP-CC-18                          | Nanoarrays                                   | 3 M KOH            | 801                                        | 1602                                       | This work  |
| Single-Ligand-NiCoP/NC               | hollow structure                             | 6 M KOH            |                                            | 1551                                       | 1          |
| NiCoP/NPC                            | folded and hollow spherical structure        | 3 M KOH            | 660.3                                      |                                            | 2          |
| NiCoP/HKUST-1@CNTs                   | Polyhedral structure                         | 6 M KOH            |                                            | 1154                                       | 3          |
| 1D NiCoP@C(Zn) nano-cuboids          | Hollow nano-cuboids with abundant micropores | 6 M KOH            |                                            | 1203                                       | 4          |
| Ni <sub>1</sub> Co <sub>1</sub> -10P | nanometer tremella flower                    | 6 M KOH            |                                            | 1188.4                                     | 5          |
| hollow NiCoP                         | hollow nanocubes                             | 6 M KOH            |                                            | 1590                                       | 6          |

**Table S2** Comparison of d-band centers of Ni and Co when B-doped with different positions of the P-site in NiCoP

| Number    | D-band center | Model of B-NiCoP                                                                     |
|-----------|---------------|--------------------------------------------------------------------------------------|
| NiCoP     | -1.61         | 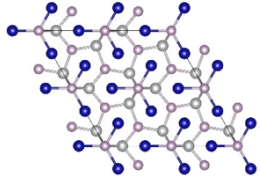   |
| B-NiCoP-1 | -1.365        |    |
| B-NiCoP-2 | -1.409        |   |
| B-NiCoP-3 | -1.346        |  |
| B-NiCoP-4 | -1.417        |  |
| B-NiCoP-5 | -1.416        |  |
| B-NiCoP-6 | -1.362        |  |



## References

1. Z. Cui, F. Yi, T. Meng, A. Gao, J. Hao, Y. Wang, S. Li, J. Huang and D. Shu, *Sustainable Mater. Techno.*, 2023, 37, e00678.
2. M. Yi, B. Lu, X. Zhang, Y. Tan, Z. Zhu, Z. Pan and J. Zhang, *Appl. Catal., B*, 2021, 283, 119635.
3. R. Zheng, H. Lin, J. Ding, P. Zhou, Y. Ying and Y. Liu, *J. Energy Storage*, 2024, 75, 109565.
4. G. Wang, A. Gao, T. Zhao, T. Meng, F. Yi, C. Liu, J. Ling, C. He and D. Shu, *Chem. Eng. J.*, 2023, 469, 143852.
5. H. Zhang, H. Guo, J. Zhang, C. Li, Y. Chen, N. Wu, Z. Pan and W. Yang, *J. Energy Storage*, 2022, 54, 105356.
6. M. Wang, J. Zhong, Z. Zhu, A. Gao, F. Yi, J. Ling, J. Hao and D. Shu, *J. Alloys Compd.*, 2022, 893, 162344.
